# Supplementary material for: Gene networks driving bovine milk fat synthesis during the lactation cycle
Source: Springer Nature journal article supplement (doi:10.1186/1471-2164-9-366), 2008-01-01

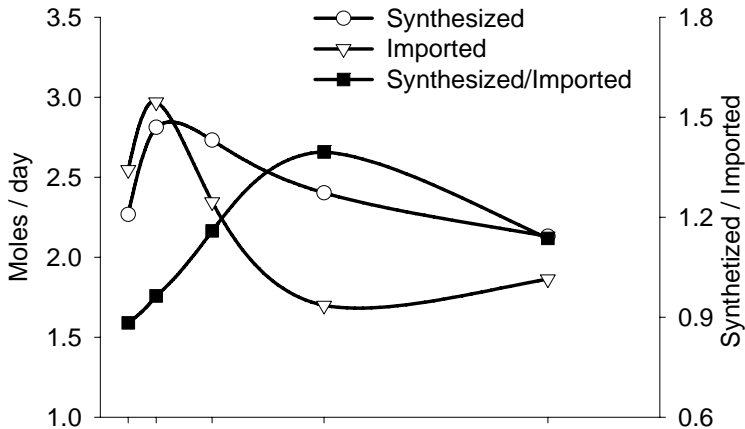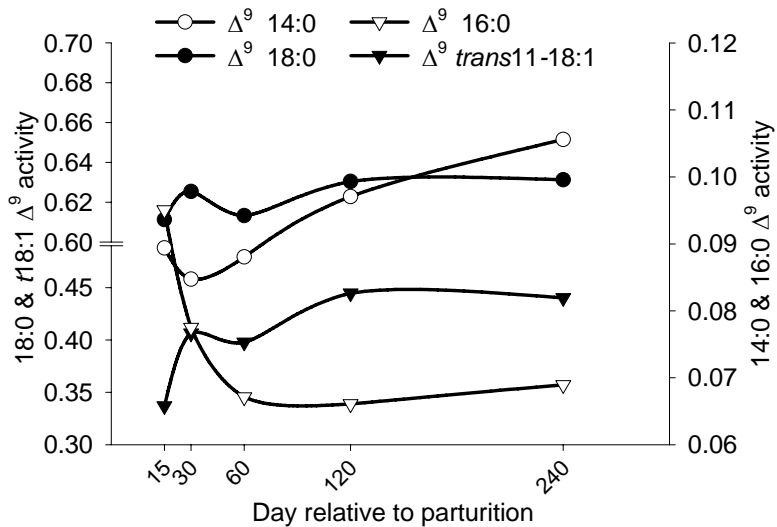

Supplement: 12864_2008_1559_MOESM3_ESM.pdf [file 12864_2008_1559_MOESM3_ESM.pdf]
