# Supplementary material for: Gene networks driving bovine milk fat synthesis during the lactation cycle
Source: Springer Nature journal article supplement (doi:10.1186/1471-2164-9-366), 2008-01-01
Supplement: 12864_2008_1559_MOESM5_ESM.pdf [file 12864_2008_1559_MOESM5_ESM.pdf]

### De novo FA synthesis

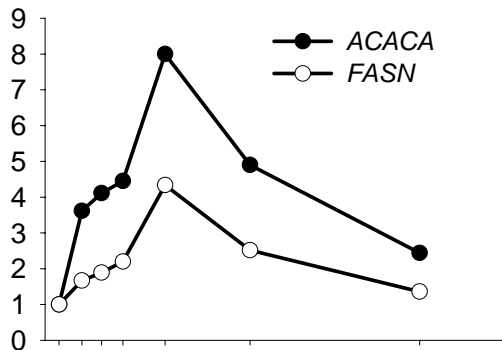

### FA desaturation

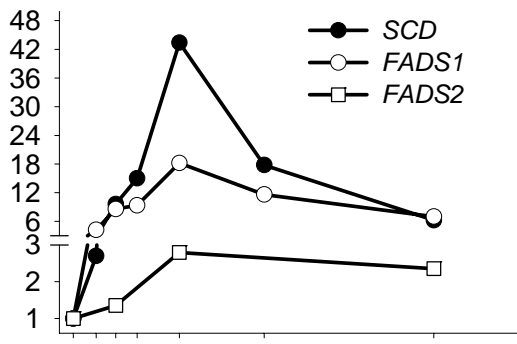

### Mono and diacylglycerol synthesis

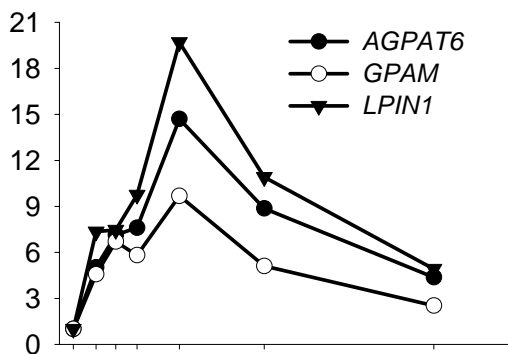

### TAG synthesis

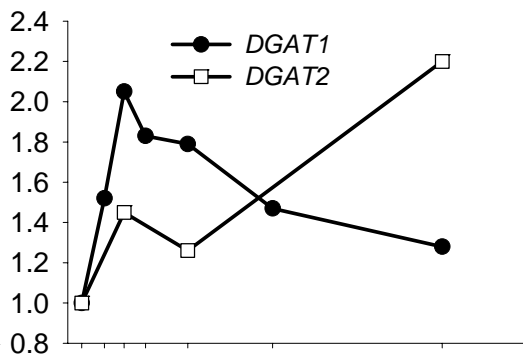

### Lipid droplet formation

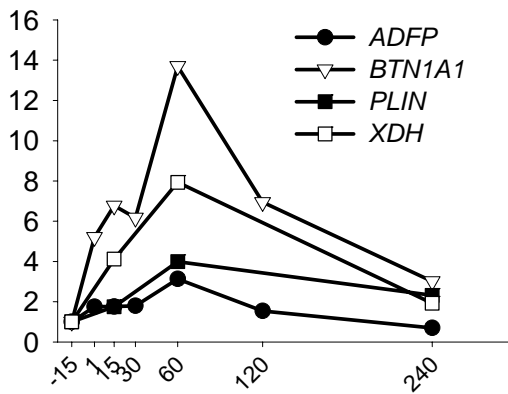

### Ketone body utilization

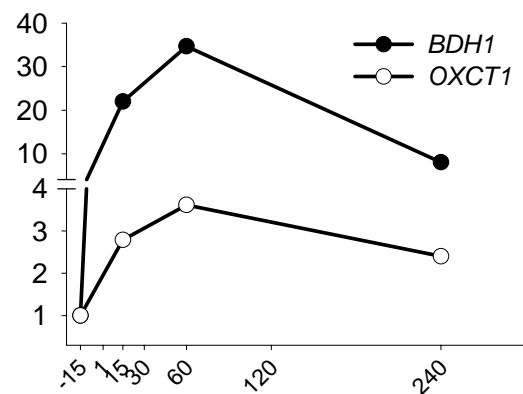

Day relative to parturition
